1 **Title:** Sex Differences in Aggression: Differential Roles of 5-HT<sub>2</sub>, Neuropeptide F  
2 and Tachykinin

3 **Authors:**

4 Andrew N. Bubak<sup>1</sup>, Michael J. Watt<sup>2</sup>, Kenneth J. Renner<sup>3</sup>, Abigail A. Luman<sup>4</sup>, Jamie  
5 D. Costabile<sup>4</sup>, Erin J. Sanders<sup>4</sup>, Jaime L. Grace<sup>5</sup>, John G. Swallow<sup>4\*</sup>

6

7 **Affiliations:**

8 <sup>1</sup>Department of Neurology, University of Colorado-Anschutz Medical Campus

9 <sup>2</sup>Center for Brain and Behavior Research, Basic Biomedical Sciences, University of  
10 South Dakota

11 <sup>3</sup>Biology Department, University of South Dakota

12 <sup>4</sup>Department of Integrative Biology, University of Colorado-Denver

13 <sup>5</sup>Department of Biology, Bradley University

14

15 \*Corresponding Author:

16 John G Swallow: [john.swallow@ucdenver.edu](mailto:john.swallow@ucdenver.edu)

17 **Keywords:**

18 5-HT<sub>2</sub>, Serotonin, Neuropeptide F, Tachykinin, RNAi, Aggression, Invertebrate,

19 Social Isolation

20

21

22

23

24

25 **Abstract:**

26

27         Despite the conserved function of aggression across taxa in obtaining critical  
28 resources such as food and mates, serotonin's (5-HT) modulatory role on  
29 aggressive behavior appears to be largely inhibitory for vertebrates but stimulatory  
30 for invertebrates. However, critical gaps exist in our knowledge of invertebrates that  
31 need to be addressed before definitively stating opposing roles for 5-HT and  
32 aggression. Specifically, the role of 5-HT receptor subtypes are largely unknown, as  
33 is the potential interactive role of 5-HT with other neurochemical systems known to  
34 play a critical role in aggression. Similarly, the influence of these systems in driving  
35 sex differences in aggressive behavior of invertebrates is not well understood. Here,  
36 we investigated these questions by employing complementary approaches in a  
37 novel invertebrate model of aggression, the stalk-eyed fly. A combination of altered  
38 social conditions, pharmacological manipulation and 5-HT<sub>2</sub> receptor knockdown by  
39 siRNA revealed an inhibitory role of this receptor subtype on aggression.  
40 Additionally, we provide evidence for 5-HT<sub>2</sub>'s involvement in regulating neuropeptide  
41 F activity, a suspected inhibitor of aggression. However, this function appears to be  
42 stage-specific, altering only the initiation stage of aggressive conflicts. Alternatively,  
43 pharmacologically increasing systemic concentrations of 5-HT significantly elevated  
44 the expression of the neuropeptide tachykinin, which did not affect contest initiation  
45 but instead promoted escalation via production of high intensity aggressive  
46 behaviors. Notably, these effects were limited solely to males, with female  
47 aggression and neuropeptide expression remaining unaltered by any manipulation

48 that affected 5-HT. Together, these results demonstrate a more nuanced role for 5-  
49 HT in modulating aggression in invertebrates, revealing an important interactive role  
50 with neuropeptides that is more reminiscent of vertebrates. The sex-differences  
51 described here also provide valuable insight into the evolutionary contexts of this  
52 complex behavior.

53

54

55

56

57

58

59

60

61

62

63

64

65

66

67

68

69

70

## 71 **1. Introduction**

72

73 Serotonin (5-HT) appears to promote aggression in invertebrates (1,2), in  
74 contrast to the largely inhibitory effect seen in vertebrates (3, but see 4). Much of  
75 the empirical support for this dichotomy comes from studies using arthropod  
76 invertebrates, with increased expression of overt aggressive behavior and greater  
77 willingness to engage in conflict seen in decapod crustaceans (5-8), crickets (9),  
78 ants (10,11), and dipteran flies (12-15) following pharmacological or genetic  
79 elevations of 5-HT at the systemic level. While these findings support the  
80 presumption that 5-HT has opposing effects on invertebrate aggression from  
81 vertebrates, there are critical gaps in knowledge that need to be considered before  
82 accurately stating that 5-HT exclusively modulates invertebrate aggression in a  
83 positive manner.

84 A more nuanced role for 5-HT in invertebrate aggression emerges when  
85 considering involvement of receptor subtypes. In vertebrates, differential binding of  
86 specific 5-HT receptors, predominantly 5-HT<sub>1A</sub>, 5-HT<sub>1B</sub>, and 5-HT<sub>2</sub> subtypes, has  
87 profound implications for aggressive behavior (16,17). Notable sequence and  
88 functional homology for these subtypes have been described in invertebrates (18),  
89 and the limited information available suggests some similarity in their influence on  
90 insect aggression (19). For example, specific pharmacological activation of 5-HT<sub>2</sub>  
91 receptors has an anti-aggressive effect in both rodents (20) and *Drosophila* (29),  
92 suggesting 5-HT<sub>2</sub> receptor function is conserved evolutionarily. In contrast, a  
93 divergent role is indicated for 5-HT<sub>1A</sub> receptors, activation of which largely dampens

94 mammalian aggression (21) while enhancing aggressive behavior in *Drosophila*  
95 (19). Whether these same similarities and differences in subtype function exist in  
96 invertebrates other than *Drosophila* remains to be determined.

97 It is also possible that 5-HT receptors have distinct functions in mediating the  
98 contextual expression of specific aggressive behaviors and their intensity, which in  
99 turn will direct how the conflict proceeds (i.e., initiation, escalation, and termination).  
100 For instance, while 5-HT<sub>1A</sub> and 5-HT<sub>2</sub> receptors are generally inhibitory for vertebrate  
101 aggression, agonists of these receptors can promote high intensity aggression in  
102 mammals during certain situations such as maternal, territorial, and self-defense  
103 (21,22), demonstrating these subtypes can exert opposing effects according to  
104 context. In male *Drosophila*, overall aggression is heightened or decreased  
105 according to 5-HT<sub>1A</sub> or 5-HT<sub>2</sub> receptor activation, respectively, but 5-HT<sub>1A</sub>  
106 predominantly affects expression of low intensity aggression (threat displays) while  
107 5-HT<sub>2</sub> mediates high intensity behaviors such as lunging (19). Contextual  
108 modulation of aggression by 5-HT is also seen in male stalk-eyed flies (*Teleopsis*  
109 *dalmanni*). Specifically, smaller males display low intensity aggression and initiate  
110 less contests when faced with a larger opponent, but pharmacologically increasing  
111 5-HT causes the smaller male to initiate and escalate fights by promoting high-  
112 intensity aggression (23). Interestingly, contest duration remains the same whether  
113 the smaller male is treated with 5-HT or not (23) In contrast, when contestants are  
114 of equal size, both aggression intensity and contest duration appear to be modulated  
115 as a function of the difference in brain 5-HT between opponents (10). In other  
116 words, size-matched opponents with closer brain 5-HT concentrations will engage in

117 prolonged high intensity contests regardless of whether 5-HT has been increased in  
118 one male, with exogenous manipulation only making contests shorter and less  
119 intense if it causes brain 5-HT to be substantially elevated above that of the  
120 opponent (10). Thus, aggression in *T. dalmanni* provides a useful model for  
121 examining how 5-HT can discretely modulate behavioral expression according to  
122 specific contexts, which will in turn determine when conflicts are initiated/terminated  
123 and if there is an escalation in the intensity of aggression during the interaction.  
124 However, it is not known if these differential effects are dependent on 5-HT receptor  
125 specificity. This relationship between 5-HT receptor subtype and aggression in *T.*  
126 *dalmanni* was investigated in the current study.

127         The extent to which 5-HT modulates discrete aggressive behaviors in  
128 invertebrates may also be influenced by the actions of neuropeptide systems, as  
129 shown for vertebrates. For example, lesioning neurons containing tachykinin (Tk)  
130 receptors reduced violent attacks in rats but left milder attacks unaffected (24).  
131 Similarly, high-intensity aggressive behavior during intrasexual contests is elicited by  
132 activation of Tk neurons in male *Drosophila* (25). Overlap in function is also seen  
133 with neuropeptide Y (NPY) and its invertebrate homolog neuropeptide F (NPF),  
134 which decrease frequency of high intensity aggression in mice and *Drosophila*,  
135 respectively (12, 22). These findings imply evolutionarily conserved roles for these  
136 neuropeptides in determining aggression intensity and conflict escalation.

137         Moreover, NPY has been shown in mammals to exert its effects by  
138 modulating 5-HT activity (22), and conversely, 5-HT directly influences NPY release  
139 in brain regions that mediate aggression (26-29). However, unlike mammals, 5-HT

140 and NPF pathways appear to act independently in regulating *Drosophila* aggression  
141 (10). Receptors for Tk are located on both 5-HT and non-5-HT neurons within the  
142 mammalian 5-HT cell body region (dorsal raphe), and can modulate neuronal firing  
143 and 5-HT release in terminal regions (30). In contrast, Tk and 5-HT do not appear to  
144 be co-localized to the same neurons in the majority of invertebrates (31-37), and  
145 while they have been shown to exert similar excitatory effects on crustacean cardiac  
146 and gut ganglia (38,39), it is unclear whether Tk and 5-HT influence each other to  
147 regulate invertebrate aggression. Combined, these findings highlight the need to  
148 consider multiple discrete measures of aggressive behavior (e.g., frequency and  
149 intensity plus contest duration) along with activity of other neuromodulators when  
150 determining the role of 5-HT as a whole.

151 Finally, a seemingly more troubling limitation in our knowledge of how 5-HT  
152 mediates aggressive behavior is the lack of studies conducted with female  
153 invertebrates. Although several studies have described neural pathways involved in  
154 aggression and related behaviors, the almost exclusive use of male subjects  
155 precludes determining whether these are sex-specific (for review see 40). Given the  
156 stark contrast in aggression and related behaviors between the sexes of many  
157 invertebrate species, as well as morphological dissimilarities (1), it is reasonable to  
158 suggest significant sex differences in underlying neural mechanisms. For instance,  
159 in the stalk-eyed fly, *T. dalmanni*, both sexes possess elongated eyestalks and  
160 engage in intrasexual aggressive contests over food resources, but unlike for males,  
161 the relatively shorter eyestalks of females do not appear to be used for assessment  
162 of opponents (41,42). Further, qualitative comparison across studies using either

163 sex suggests females rarely engage in high intensity aggression (e.g., 1,41,42).  
164 Pharmacologically increasing 5-HT in a smaller male will override the inhibition of  
165 aggression evoked by perception of a larger opponent with longer eyestalks (23),  
166 and expression of high intensity aggression by males in size-matched or  
167 mismatched contests is increased by 5-HT treatment (2). The sex difference in  
168 opponent perception and aggression level, combined with the known effects of 5-HT  
169 on these behaviors in males, makes *T. dalmanni* an ideal model species for  
170 examining whether insect aggression is modulated by 5-HT in a sex-dependent  
171 manner.

172 Here, we sought to address some of the gaps in knowledge about 5-HT  
173 influences on invertebrate aggression by employing a range of complementary  
174 experimental approaches using both male and female *T. dalmanni*. Specifically, we  
175 determined 1) whether 5-HT receptor subtypes mediate expression of aggressive  
176 intensity and contest progression, 2) if there is a direct functional relationship  
177 between 5-HT subtypes and the neuropeptides Tk and NPF in regulating  
178 aggression, and 3) how these findings differ between sexes. Using a combination of  
179 socio-environmental manipulation, RNA interference (RNAi), and pharmacological  
180 treatment, we describe sex-specific roles for 5-HT<sub>2</sub> receptors, Tk and NPF in  
181 behavioral expression and how this relates to contest progression and outcome. We  
182 also demonstrate a direct effect of 5-HT on neuropeptide expression that is posited  
183 to modulate male aggression. Our results reveal the impressive level of  
184 conservation with respect to neurochemical mechanisms among species as diverse



185 as vertebrates and invertebrates, and highlights the need to consider multiple factors  
186 when determining potential taxonomic differences in how 5-HT mediates aggression.

187

## 188 **2. Materials and Methods**

189

### 190 *Subjects:*

191 The sexually dimorphic stalk-eyed fly, *Teleopsis dalmanni*, is native to South  
192 East Asia. All flies used in this study were descendants of pupae collected from wild  
193 populations in 2012, Gombak Field Station, housed at the University of Maryland,  
194 College Park. Individuals were housed communally in cages (45 cm x 22 cm x 19  
195 cm) on a 12-h light:dark cycle with free access to food, water, and mates. Sexually  
196 mature flies in this study were briefly anesthetized using ice and eye span measured  
197 to the nearest 0.01 mm using cellSens standard software (Olympus). Size-matched  
198 individuals were determined as being < 1% difference in eye span. The high  
199 correlation of eye span to body size in this species makes eye span an accurate  
200 representation of body size (43, 44). Predetermined opponents were given  
201 identifying paint marks between their thoracic spines and housed in separate  
202 communal enclosures prior to surgeries and fight contests. Isolated flies were  
203 housed individually for 7 days prior to fight contests.

204

### 205 *Drug administration:*

206 Flies selected for 5-HT manipulation were fed sterilized, pureed sweet corn  
207 containing either 3 g of 5-hydroxy-L-tryptophan (5-HTP; H9772; Sigma, St. Louis,

208 MO) in 100 mL media or vehicle/100 mL media for 4 days as previously described  
209 (14, 15). Specifically, the vehicle media contained 100 mL of corn, 1 mL of  
210 methylparaben (Ward's Science, Rochester, NY) as a mold inhibitor (Wilkinson  
211 1993), and 25 mg of ascorbic acid (Sigma, St. Louis, MO) to act as a stabilizer (12).

212

213 *Forced-fight paradigm and behavioral analysis:*

214 Opponent matchups for the experiments described below are as follows:  
215 socially isolated vs socially reared, 5-HT<sub>2</sub> siRNA vs vehicle siRNA, and 5-HTP  
216 treated vs vehicle treated. Using previously published methods (e.g., 15), size- and  
217 sex-matched opponents were placed in an arena (11 cm x 6.5 cm x 5 cm) containing  
218 a glass wall and ceiling, for filming, and a removable cardboard barrier that  
219 separated the individuals. Flies were starved for 12 hours prior to the contest to  
220 increase the incentive to fight over a piece of pureed corn that was placed in the  
221 arena center immediately following barrier removal. All contests that occurred  
222 during 10 mins of fighting were scored using the behavioral scoring software,  
223 JWatcher (UCLA). Scored behaviors for each individual were based on an existing  
224 ethogram adapted from Egge et al. (45). Specific behaviors fall into three  
225 categories: contest initiation, escalation, and termination. Contest initiations were  
226 determined by one opponent approaching the other, which ultimately results in an  
227 aggressive behavioral exchange. Only one opponent was awarded an initiation per  
228 contest, none were awarded if there was ambiguity in determining the initiator.  
229 Escalations of fights were determined by high-intensity (HI) physical contact  
230 behaviors (see 15). Termination and subsequent winners of contest were

231 determined by retreats, with the individual with the fewest number of retreats after  
 232 the 10 minute fighting period deemed the winner.

233

234 *RNA isolation and quantification:*

235 RNA isolation was conducted from dissected whole-brain tissue using the  
 236 Direct-zol™ RNA MiniPrep (ZYMO Research, Irvine, CA) according to the  
 237 manufacturer's instructions. Isolated RNA was reverse transcribed using the  
 238 Maxima First Strand cDNA synthesis kit (Thermo Fisher Scientific, Waltham, MA).  
 239 Quantitative PCR was performed by an Applied Biosystem's StepOne machine  
 240 (Foster City, CA) using TaqMan master mix (Applied Biosystems), the primer-probe  
 241 pair for the endogenous control, Gapdh, and one of the following target gene primer-  
 242 probe pairs: 5-HT<sub>1A</sub>, 5-HT<sub>2</sub>, 5-HT<sub>7</sub>, SERT, Tk, or NPF<sub>r</sub> (Integrated DNA  
 243 Technologies, Coralville, Iowa; Table 1). We intentionally focused on the Tk ligand  
 244 itself and not the receptor due to ambiguity in the specific receptor responsible for  
 245 baseline aggression in dipteran flies (24). Relative quantification (RQ) of the PCR  
 246 product was conducted using the comparative C<sub>T</sub> method (46). Values were  
 247 presented as target gene expression relative to the endogenous control Gapdh).

248

249 Table 1: The primer-probe pair for the endogenous control, Gapdh, and the targeted genes.

| Gene               | Primer (Fwd)                  | Primer (Rev)                  | Probe                             |
|--------------------|-------------------------------|-------------------------------|-----------------------------------|
| Gapdh              | 5'-GACCGTGAGTAGAGTCGTATTTG-3' | 5'-TTCTCCGTGCTGCTGTTT-3'      | 5'-TTGACTGCTACAACGGAAGCTCCG-3'    |
| 5-HT <sub>1A</sub> | 5'-GGGCTCAATGCTCCTCAATAA-3'   | 5'-CGCTGCTCGTATCAGTTTCA-3'    | 5'-TGTCAACGGAAGTGACCTTATGGCA-3'   |
| 5-HT <sub>2</sub>  | 5'-TCCGTGTCGCTCTTTCTTTC-3'    | 5'-CGTTGCTTTACAGGCGATTTATT-3' | 5'-AGGTTTCAGTAGATGCGCGACGTTT-3'   |
| 5-HT <sub>7</sub>  | 5'-AGGTTTGGGGAAGTCTCTATTC-3'  | 5'-GCCACAGTCACTTTCCTCATT-3'   | 5'-TCGGATTCAGTAGCGAGTTTGCATAGC-3' |
| SERT               | 5'-GCCAAATTCGGTGCTGTTATT-3'   | 5'-CTACACTGCACCTTCTGTATG-3'   | 5'-TGGGATCCATAATTGCCCACTTGC-3'    |
| NPF <sub>r</sub>   | 5'-CGAATGCAATGGCCGTAATG-3'    | 5'-GGTTCGTATGCTGTCTTGTGTA-3'  | 5'-AAGCCTGCAACATGGCAATCATCT-3'    |
| TK                 | 5'-TTCTGTGTTGCTGCTCTTAT-3'    | 5'-GGCGAAGATGACGGTATATCAA-3'  | 5'-CGCACACCAACGAAAGCGTTTGAA-3'    |

250

251

252 *RNAi design and administration:*

253 Results from the RNA quantification revealed that expression of 5-HT<sub>2</sub>  
254 receptors in male flies was approximately half that seen in females, while 5-HT<sub>1A</sub>  
255 expression was 1.5 times higher in males (see Results and Fig. 1). More aggressive  
256 isolated male flies also had lower 5-HT<sub>2</sub> expression than their socially-housed  
257 counterparts, while no difference was seen in 5-HT<sub>1A</sub> receptors (Fig. 3). Studies in  
258 male *Drosophila* have indicated that 5-HT<sub>2</sub> receptors have a specific inhibitory effect  
259 on high intensity aggression, while 5-HT<sub>1A</sub> receptors promote low intensity (non-  
260 contact) behaviors (19). In addition, sex differences in *T. dalmanni* intrasexual  
261 aggression predominantly relate to lack of high intensity behaviors in females, which  
262 have lower 5-HT<sub>2</sub> receptor expression than males (Fig. 1). Therefore, we conducted  
263 loss-of-function studies targeting the 5-HT<sub>2</sub> rather than the 5-HT<sub>1A</sub> receptor for  
264 examining how 5-HT receptor subtype modulates aggression and neuropeptide  
265 activity in this species.

266

267 **Fig. 1.** Relative mRNA expression between normally reared adult male and female  
268 stalk-eyed flies. Males have a significantly lower expression of 5-HT<sub>2</sub> ( $0.41 \pm 0.03$ ,  $n = 9$   
269 vs  $1.0 \pm 0.002$ ,  $n = 9$ ) and SERT ( $0.284 \pm 0.02$ ,  $n = 9$  vs  $1.0 \pm 0.001$ ,  $n = 9$ ) but  
270 significantly higher expression levels of 5-HT<sub>1A</sub> ( $1.64 \pm 0.17$ ,  $n = 12$  vs  $1.0 \pm 0.001$ ,  $n = 9$ )  
271 compared to their female counterparts. There was no statistical difference in  
272 expression levels of 5-HT<sub>7</sub> between males and females. Values are normalized to female  
273 expression levels and presented as mean  $\pm$  SEM. (Two-tailed, Student's *t*-test;  $p < 0.05^*$ ,  
274  $p < 0.01^{**}$ ,  $p < 0.001^{***}$ ).  
275

276

277 Dicer-substrate siRNAs (short interfering RNA) used in this study were  
278 synthesized by IDT (Integrated DNA Technologies, Coralville, IA). Probes targeting  
279 5-HT<sub>2</sub> were generated using cDNA sequences of *T. dalmanni*. Probes targeting  
280 green fluorescent protein (GFP) were generated from cDNA sequences of *Aequorea*  
281 *coerulescens*. The siRNA was coated (1:1 ratio) in the transfection reagent  
282 polyethylenimine (PEI) to aid in membrane penetration and stabilization. Injections  
283 were administered in the head cavity through the base of the proboscis. The brain  
284 was not penetrated with the needle.

285 Males and females were randomly selected from a social cage and size- and  
286 sex-matched to an opponent. Treatment groups were allocated randomly, with  
287 experimental males and females being injected with 100 nL of 5-HT<sub>2</sub> siRNA solution  
288 and control flies injected with 100 nL of GFP siRNA solution. All subjects were  
289 returned to their previous housing conditions and allowed to recover for 48 hours  
290 with free access to food and water. Flies were then placed in the forced-fight  
291 paradigm described above.

292

#### 293 *5-HT quantification:*

294 Quantification of brain 5-HT was conducted using high-performance liquid  
295 chromatography (HPLC) with electrochemical detection as previously described  
296 (14). Briefly, whole brains were dissected and frozen in 60 µL of acetate buffer  
297 containing the internal standard α-methyl-dopamine (Merck) and stored at -80°C.  
298 Samples were thawed and centrifuged at 17,000 rpms. A portion of the sample (45  
299 µL) was injected into the chromatographic system and the amines were separated

300 with a C<sub>18</sub> 4 µm NOVA-PAK radial compression column (Waters Associates, Inc.  
301 Milford, MA) and detected using an LC 4 potentiostat and a glassy carbon electrode  
302 (Bioanalytical systems, West Lafayette, IN). The CSW32 data program (DataApex  
303 Ltd., Czech Republic) calculated monoamine concentrations based on peak height  
304 values that were obtained from standards (Sigma-Aldridge, St. Louis, MO). The  
305 remaining sample was solubilized for protein analysis with 60 µL of 0.4 M NaOH  
306 (47). The final amine concentrations are expressed as pg amine/ µg protein  
307 following appropriate corrections for injection vs preparation volume.

308

### 309 *Statistical analysis:*

310 To account for behavioral data not meeting assumptions of normality and  
311 equal variance, separate two-tailed Wilcoxon matched pairs signed-rank tests were  
312 used to compare frequency of contest initiations, expression of high intensity  
313 aggression and contest outcome between treated and control groups. Separate  
314 two-tailed Student's *t*-tests were applied to test for relative differences in mean  
315 mRNA expression for 5-HT<sub>1A</sub>, 5-HT<sub>2</sub>, 5-HT<sub>7</sub>, SERT, Tk, or NPFr between treatment  
316 groups, as well as for differences in mean 5-HT concentrations as quantified by  
317 HPLC. Alpha level was set at 0.05 throughout, and analyses performed using Prism  
318 (GraphPad Software, Inc; La Jolla, CA).

319

### 320 **3. Results and Discussion**

321

322 *Expression of 5-HT<sub>1A</sub>, 5-HT<sub>2</sub>, 5-HT<sub>7</sub> receptors and the serotonin transporter in male*  
323 *and female brains:*

324         Since 5-HT plays a prominent role in modulating invertebrate aggression (1),  
325 including increasing aggressive displays in male *T. dalmanni*, we first measured  
326 relative sex differences in mRNA expression of 5-HT<sub>1A</sub>, 5-HT<sub>2</sub>, and 5-HT<sub>7</sub> receptors  
327 and the 5-HT transporter (SERT; Fig. 1). Males had markedly lower expression  
328 levels of the 5-HT<sub>2</sub> receptor subtype (Student's *t*-test,  $p < 0.001$ ) and SERT  
329 (Student's *t*-test,  $p < 0.001$ ) but significantly higher levels of 5-HT<sub>1A</sub> (Student's *t*-test,  
330  $p < 0.01$ ; Fig. 1) compared to females. Males and females had similar expression  
331 levels of the 5-HT<sub>7</sub> receptor subtype (Fig. 1).

332

333 *Expression of the neuropeptide Tk and the NPF receptor in male and female brains:*

334         We also investigated the expression of the NPF receptor in male and female  
335 flies, since NPY and the invertebrate analog NPF inhibits aggressive behavior in  
336 other animal species (12, 22). We also measured the baseline expression of the  
337 neuropeptide Tk, which has been reported to increase aggression in vertebrates and  
338 *Drosophila* (24, 25). Baseline relative mRNA expression levels of the NPF receptor  
339 ( $1 \pm 0.07$ ,  $n = 12$  vs  $0.86 \pm 0.05$ ,  $n = 12$ ; Student's *t*-test,  $p > 0.05$ ) and Tk ( $1 \pm 0.23$ ,  
340  $n = 7$  vs  $0.95 \pm 0.17$ ,  $n = 9$ ; Student's *t*-test,  $p > 0.05$ ) were similar between females  
341 and males, respectfully.

342

343 *Increased aggression corresponds with reduced 5-HT<sub>2</sub> and heightened Tk*  
344 *expression in males but not in females:*

345           Social isolation increases aggression in both invertebrate and vertebrate  
346 species (19, 48-50). We first tested whether social isolation induced aggression in  
347 male stalk-eyed flies. Following 7 days of isolation, males had a higher probability of  
348 winning the aggressive confrontation compared to their socially reared opponents  
349 (Fig. 2D; 85% vs 15%). Isolated males also initiated significantly more  
350 confrontations (Fig. 2A; Wilcoxon matched-pairs signed rank test,  $p < 0.01$ ) and  
351 performed more high-intensity (physical) behaviors than their socially-reared  
352 opponents (Fig. 2C; Wilcoxon matched-pairs signed rank test,  $p < 0.05$ ). When we  
353 repeated this experiment with female flies we found no difference in either initiations  
354 or escalations of aggression in socially-isolated females when compared to colony-  
355 raised females (Fig. 2B). The lack of alterations in aggressive behaviors in female  
356 fights did not allow for easily identified winners, thus the probability of winning the  
357 aggressive encounter was not computed.

358

359 **Fig. 2.** Social isolation increased initiations, escalations, and winning probability in  
360 males but not females. A) Males, socially isolated, performed significantly more  
361 initiations compared to their socially reared opponents. B) Social isolation had no  
362 effect on initiations in female aggressive contests. C) Males, socially isolated, performed  
363 significantly more high-intensity aggressive behaviors compared to their socially reared  
364 opponents. Behavior values are normalized to control opponents with connecting black  
365 lines representing opponents. Red lines represent the mean slope of the differences in  
366 behaviors performed between paired opponents and the blue shaded areas represent  
367 the 95% confidence interval. (Two-tailed, Wilcoxon matched-pairs signed-rank test;  $n =$   
368  $20$ ,  $p < 0.05^*$ ,  $p < 0.01^{**}$ ,  $p < 0.001^{***}$ ). D) Males that were socially isolated had a  
369 significantly higher winning percentage compared to their socially reared opponents  
370 (85% vs 15%; error bars represent 95% confidence interval).  
371

372           Next, we measured brain 5-HT<sub>2</sub> and Tk expression to determine if expression  
373 levels covaried with the display of increased aggression. In male flies raised in



374 social isolation, there was a decrease in 5-HT<sub>2</sub> expression relative to colony-raised  
375 flies (Fig. 3; Student's *t*-test,  $p < 0.01$ ). In contrast, Tk expression was markedly  
376 increased in brains obtained from socially isolated male flies relative to colony-raised  
377 males (Fig. 3; Student's *t*-test,  $p < 0.001$ ). Expression of 5-HT<sub>1A</sub>, 5-HT<sub>7</sub>, and NPFR  
378 were not different between groups (Fig. 3). In contrast, when the experiment was  
379 repeated in females, we found expression levels of 5-HT<sub>2</sub> and Tk in socially isolated  
380 flies did not differ significantly from values obtained in colony-raised flies (Fig. 3).  
381 Similar to males, females did not show differences in the expression of brain 5-HT<sub>1A</sub>,  
382 5-HT<sub>7</sub>, or NPFR following isolation (data not shown).

383

384 **Fig. 3.** Social isolation reduced 5-HT<sub>2</sub> expression and increased Tk expression in males  
385 but not females. A) Expression of 5-HT<sub>2</sub> reduced ~28% in males following social  
386 isolation ( $1.0 \pm 0.074$ ,  $n = 9$  vs  $.72 \pm 0.06$ ,  $n = 12$ ) whereas Tk expression was increased  
387 ~77% compared to socially reared males ( $1.0 \pm 0.13$ ,  $n = 9$  vs  $1.77 \pm 0.04$ ,  $n = 6$ ). B) No  
388 change in expression value of 5-HT<sub>2</sub> or Tk was measured in females following social  
389 isolation. Similar to males, females did not show differences in 5-HT<sub>1A</sub>, 5-HT<sub>7</sub>, or NPFR  
390 expression levels (data not shown). Values are normalized to socially reared  
391 expression levels and presented as mean  $\pm$  SEM. (Two-tailed, Student's *t*-test;  $p < 0.05^*$ ,  
392  $p < 0.01^{**}$ ,  $p < 0.001^{***}$ ).

393

394

395 *5-HT<sub>2</sub> knock-down increases aggression in males but not in females:*

396 To functionally test the role of 5-HT<sub>2</sub> in aggression, we designed siRNA to  
397 selectively knock-down the receptor subtype. Intracranial injections of 5-HT<sub>2</sub> siRNA  
398 reduced 5-HT<sub>2</sub> receptor expression by approximately 30% 48 hours after the  
399 injection compared to control-injected individuals (siRNA generated to target GFP;  
400 Fig. 4; Student's *t*-test,  $p < 0.05$ ). Importantly, the designed 5-HT<sub>2</sub> siRNA was

401 specific, as it did not affect the expression of the closely related 5-HT<sub>1A</sub> receptor (Fig.  
402 4).

403

404 **Fig. 4.** Individual flies injected with 5-HT<sub>2</sub> siRNA had significantly reduced 5-HT<sub>2</sub>  
405 expression levels compared to vehicle injected siRNA ( $1.0 \pm .09$ ,  $n = 9$  vs  $0.68 \pm 0.06$ ,  $n =$   
406 6). 5-HT<sub>2</sub> siRNA did not affect expression levels of the closely related 5-HT<sub>1A</sub> receptor.  
407 Values are normalized to vehicle injected individuals and presented as mean  $\pm$  SEM.  
408 (Two-tailed, Student's *t*-test;  $p < 0.05^*$ ,  $p < 0.01^{**}$ ,  $p < 0.001^{***}$ ).  
409

410 Socially-reared males injected with 5-HT<sub>2</sub> siRNA initiated more confrontations  
411 compared to their vehicle-injected opponents (Fig. 5; Wilcoxon matched-pairs signed  
412 rank test,  $p < 0.001$ ). However, high-intensity behaviors in males did not differ  
413 between 5-HT<sub>2</sub> siRNA injected and vehicle-injected opponents (Fig. 5). Female  
414 opponents did not differ in either initiations or high-intensity behaviors, despite 5-HT<sub>2</sub>  
415 siRNA-injected females having significantly lower 5-HT<sub>2</sub> expression levels compared  
416 to their vehicle-treated opponents (Fig. 5).

417

418 **Fig. 5.** 5-HT<sub>2</sub> siRNA injections increased initiations and winning probability in males  
419 but not females. A) Males, injected with 5-HT<sub>2</sub> siRNA, performed significantly more  
420 initiations compared to their vehicle injected opponents. B) 5-HT<sub>2</sub> siRNA had no effect  
421 on initiations in female aggressive contests. C) Males, injected with 5-HT<sub>2</sub> siRNA, had  
422 no differences in high-intensity aggressive behaviors compared to their vehicle injected  
423 opponents. Behavior values are normalized to control opponents with connecting black  
424 lines representing opponents. Red lines represent the mean slope of the differences in  
425 behaviors performed between paired opponents and the blue shaded areas represent  
426 the 95% confidence interval. (Two-tailed, Wilcoxon matched-pairs signed-rank test;  $n =$   
427 16,  $p < 0.05^*$ ,  $p < 0.01^{**}$ ,  $p < 0.001^{***}$ ). D) Males, injected with 5-HT<sub>2</sub> siRNA, had a  
428 significantly higher winning percentage compared to their vehicle injected opponents  
429 (81% vs 19%; error bars represent 95% confidence interval).  
430

431

432 *5-HT<sub>2</sub> activity modulates NPF $\alpha$  expression in males but not females:*

433 To probe for potential interactions between 5-HT and neuropeptides in  
434 modulating aggression in males, we next measured brain NPFr and Tk expression  
435 levels following the siRNA-induced reduction in 5-HT<sub>2</sub>. Reducing expression of 5-  
436 HT<sub>2</sub> using siRNA significantly reduced NPFr expression in males (Fig. 6; Student's *t*-  
437 test,  $p < 0.01$ ). When this experiment was repeated in females, our results showed  
438 that reduction of 5HT<sub>2</sub> receptors did not significantly affect NPFr expression (Fig. 6).  
439 Expression of Tk did not differ in males or females treated with 5-HT<sub>2</sub> siRNA (Fig. 6).

440

441 **Fig. 6.** A) Injections of 5-HT<sub>2</sub> siRNA did not alter expression levels of Tk in either males  
442 or females compared to their vehicle injected counterparts. B) Injections with 5-HT<sub>2</sub>  
443 siRNA reduced NPFr expression in males ( $0.69 \pm 0.07$ ,  $n = 9$  vs  $1.0 \pm 0.06$ ,  $n = 12$ )  
444 compared to vehicle injected individuals but not in females. Values are normalized to  
445 female expression levels and presented as mean  $\pm$  SEM. (Two-tailed, Student's *t*-test;  $p$   
446  $< 0.05^*$ ,  $p < 0.01^{**}$ ,  $p < 0.001^{***}$ ).

447

448 *Elevating 5-HT concentrations increases Tk expression in males but not females:*

449 We have previously reported an increase in high-intensity aggressive  
450 behaviors in male stalk-eyed flies following administration of the 5-HT metabolic  
451 precursor, 5-HTP (15). When we repeated this study in female stalk-eyed flies, we  
452 found that 5-HTP-treated individuals do not exhibit a significant difference in  
453 aggressive behaviors compared to their untreated opponents, despite having  
454 significantly elevated brain 5-HT concentrations ( $18.44 \pm 2.99$ ,  $n = 18$  vs  $9.8 \pm 0.6$ ,  $n$   
455  $= 19$ ; pg/ $\mu$ g protein; Student's *t*-test,  $p < 0.01$ ). In fact, the observation of a fight  
456 containing a single high-intensity behavior was so rare that accurate measurements  
457 couldn't be taken. We next explored whether this sex-difference in the expression of  
458 high-intensity behaviors following 5-HTP administration might be related to changes

459 in Tk expression. Indeed, males treated with 5-HTP had significantly higher Tk  
460 expression compared to vehicle-treated males (Fig. 7; Student's *t*-test,  $p < 0.001$ ).  
461 In contrast, females treated with 5-HTP did not have a significant difference in Tk  
462 expression when compared to controls (Fig. 7A). Additionally, expression of NPFr  
463 was also significantly raised in males following 5-HTP treatment but not in females  
464 (Fig. 7B; Student's *t*-test,  $p < 0.001$ ). We did not find significant differences in the  
465 expression of brain levels of 5-HT<sub>1A</sub>, 5-HT<sub>2</sub>, or 5-HT<sub>7</sub>, respectively, in either males or  
466 females treated with 5-HTP when compared to vehicle-treated controls.

467

468 **Fig. 7.** A) Treatment with 5-HTP increased expression levels of Tk in males compared to  
469 vehicle treated individuals ( $3.46 \pm 0.36$ ,  $n = 12$  vs  $1.0 \pm 0.09$ ,  $n = 9$ ) but not in females.  
470 B) Treatment with 5-HTP increased expression levels of NPFr in males compared to  
471 vehicle treated individuals ( $1.48 \pm 0.07$ ,  $n = 12$  vs  $1.05 \pm 0.11$ ,  $n = 9$ ) but not in females.  
472 Values are normalized to female expression levels and presented as mean  $\pm$  SEM. (Two-  
473 tailed, Student's *t*-test;  $p < 0.05^*$ ,  $p < 0.01^{**}$ ,  $p < 0.001^{***}$ ).  
474

475

476 In these studies, we used the sexually dimorphic stalk-eyed fly as a model to  
477 study how aggression is mediated by both 5-HT and neuropeptides. This model  
478 offers several advantages for obtaining a better grasp, both functionally and  
479 evolutionarily, of the origin and regulation of this complex behavior across taxa and  
480 sexes. First, flies contain fewer neurons and neuronal connections compared to  
481 vertebrates while simultaneously maintaining the relevant behaviors. Additionally,  
482 the monoaminergic and peptidergic systems involved in these behavioral processes  
483 are highly conserved across taxa (18, 24, 25, 51-54). This is not surprising given the  
484 fitness benefits and selection pressures of engaging in aggressive conflicts in most

485 living animal species. Finally, the extreme differences in both morphology and  
486 behavior between male and female stalk-eyed flies provides a valuable perspective  
487 of the proximate mechanisms that have been acted upon by selection forces to  
488 result ultimately in sex-specific aggression.

489 Here, we found that male and female flies raised in social colonies  
490 differentially express central 5-HT<sub>1A</sub>- and 5-HT<sub>2</sub>-like receptor subtypes and SERT.  
491 Specifically, males show higher expression of 5-HT<sub>1A</sub> receptors but lower expression  
492 of 5-HT<sub>2</sub> receptors and SERT compared to females. In contrast, 5-HT<sub>7</sub> receptor  
493 expression was equivalent in both sexes. Naturally reduced SERT in males would  
494 presumably result in lower 5-HT clearance and corresponding increases in  
495 extracellular 5-HT. Combined with the positive relationship between experimentally  
496 enhanced 5-HT and male aggression shown by ourselves (14, 15) and others (12,  
497 13, 19), this points to inherently greater serotonergic activity as an explanation for  
498 observed sex differences in stalk-eyed fly aggression. Further, our findings suggest  
499 this is principally mediated through a balance of signaling in favor of 5-HT<sub>1A</sub> versus  
500 5-HT<sub>2</sub> receptor activation.

501 To test this, we investigated the effects of social isolation on aggression and  
502 expression of serotonin receptor subtypes in male and female stalk-eyed flies.  
503 Previous studies indicate that social vertebrates and invertebrates that are either  
504 reared in isolation or exposed to periods of isolation exhibit increases in aggression  
505 to conspecifics (19, 48-50, 55). In line with this, we found that socially isolated male  
506 stalk-eyed flies increase conflict initiations, fight escalation, and have a higher  
507 probability of winning a fight. This result suggests that the absence of socialization

508 in male stalk-eyed flies may impair detection of social cues that dampen normal  
509 aggressive responses and prevent the escalation of a fight to potentially injurious  
510 intensities. The finding that isolated males exhibit higher levels of aggression is  
511 similar to isolation effects on *Drosophila* behavior (19). In contrast, while isolation  
512 also increases aggression in female *Drosophila* (56), socially reared and socially-  
513 isolated females in our study exhibited similar levels of initiations and escalations in  
514 aggressive behavior. When we evaluated the expression of 5-HT-like receptors,  
515 there were no differences in either 5-HT<sub>1A</sub> or 5-HT<sub>7</sub> receptors in either sex when  
516 compared to socially reared flies. However, the expression of 5-HT<sub>2</sub> receptors  
517 decreased in males but not females when compared to socially reared controls.  
518 These results differ from earlier work in *Drosophila* which showed that socially-  
519 isolated males had decreased expression of 5-HT<sub>1A</sub>- and increased expression of 5-  
520 HT<sub>2</sub>-like receptor mRNA (19). These differences may be species specific, but more  
521 likely may be related to the isolation protocol employed. In the *Drosophila* study, the  
522 flies were isolated 2 to 3 days post-eclosion and kept in constant light, whereas we  
523 isolated sexually mature flies for 7 days and used a 12:12 light dark cycle.  
524 Regardless, the isolation-induced reduction in 5-HT<sub>2</sub> receptors seen here would  
525 allow for greater activation of 5-HT<sub>1A</sub> receptors even in the absence of altered  
526 expression of the latter subtype. Together with our behavioral findings, this further  
527 supports the notion that decreased and increased activation of 5-HT<sub>2</sub> and 5-HT<sub>1A</sub>  
528 receptors, respectively, is a likely substrate for heightened aggression following  
529 either social isolation or enhanced serotonergic activity.

530           In addition to measuring 5-HT-like receptor subtypes, we also evaluated the  
531 expression of Tk and NPF receptors in socially-isolated and socially reared flies.  
532 Neither NPF receptors nor Tk in females was affected by social isolation, and  
533 expression of NPF receptors did not differ with rearing condition in males. In  
534 contrast, the expression of Tk was markedly increased in socially-isolated males.  
535 Recent work in *Drosophila* has shown that neurons expressing Tk regulate male-  
536 male aggression (25), suggesting the increase in Tk found in socially-isolated male  
537 stalk-eyed flies likely contributes to the increase in aggression displayed by these  
538 insects, similar to what is observed in vertebrate species (57). Further, the finding  
539 that only males showed both increased Tk and reduced 5-HT<sub>2</sub> receptors implicates  
540 the combination of these factors in determining sex-specific changes in aggression  
541 caused by social isolation.

542           The decreased expression of 5-HT<sub>2</sub>-receptors, increased Tk expression and  
543 heightened aggression following social isolation led us to investigate if there was a  
544 direct relationship among these factors, which we tested by genetic knockdown of 5-  
545 HT<sub>2</sub> receptors. In line with our prediction, males exhibited increased aggression with  
546 5HT<sub>2</sub> receptor knockdown, suggesting that serotonergic activation of the 5HT<sub>2</sub>-like  
547 receptor normally acts to dampen aggression. This result is consistent with earlier  
548 work in *Drosophila*, which showed that treatments with 5-HT<sub>2</sub> agonists decreased  
549 aggression (19), and further implicates the balance between 5-HT<sub>1A</sub> and 5-HT<sub>2</sub>  
550 signaling in determining expression of aggressive behavior. Interestingly, 5-HT<sub>2</sub>  
551 knockdown had no effect on male Tk expression, suggesting that the increase in Tk  
552 observed in socially isolated males is independent of the decrease in the expression

553 of the 5-HT<sub>2</sub> receptor subtype. While Tk was not affected by 5-HT<sub>2</sub> knockdown,  
554 there was a significant reduction in expression of NPF receptors in male brains. In  
555 *Drosophila*, NPF decreases aggression (12), hence the decreased expression of  
556 NPF receptors (and subsequent dampening of NPF signaling) seen in our study may  
557 contribute to the increased aggression exhibited by male stalk-eyed flies following  
558 knockdown of the 5-HT<sub>2</sub>-like receptor. Work using genetically modified male  
559 *Drosophila* suggests that 5-HT and NPF function independently to modulate  
560 aggression in an additive manner (12). Similarly, increased aggressive behavior  
561 displayed by neuropeptide Y1 receptor-knockdown mice is normalized by  
562 pharmacological activation of 5-HT<sub>1A</sub> receptors (22), implying independent actions of  
563 5-HT and NPY in mediating vertebrate aggression. However, other behaviors  
564 mediated by central NPY activity in rodents, such as feeding and helplessness, have  
565 been shown to be directly linked with 5-HT<sub>2</sub> receptor function (58, 59). Our results  
566 suggest that aggression in stalk-eyed flies may be similarly modulated by 5-HT<sub>2</sub>  
567 receptor-dependent interactions between 5-HT and NPF signaling, in contrast to the  
568 dissociated effects of 5-HT and NPF on aggression as shown in mice and  
569 *Drosophila*. Combined, it is tempting to speculate that activation of 5-HT<sub>2</sub> receptors  
570 in *T. dalmanni* may directly increase NPF to act as a brake on expression of male  
571 aggression.

572         While only NPF receptor expression was affected by 5-HT<sub>2</sub> knockdown, male  
573 flies showed increases in both Tk and NPF receptor expression following 5-HTP  
574 administration. The finding that enhancing 5-HT levels can increase NPF receptors  
575 is reminiscent of neurochemical interactions in the mammalian hypothalamus, where



576 5-HT can directly enhance release of the vertebrate homolog NPY (26, 27), and  
577 suggests similar mechanisms in stalk-eyed flies. The means by which 5-HT may be  
578 acting to increase Tk in male flies is not clear, given the lack of neuronal co-  
579 localization of Tk-like peptides and 5-HT in most invertebrates (31-37). However, 5-  
580 HT neurons do appear to synapse on to Tk-immunoreactive terminals in the brain of  
581 the desert locust, *Schistocerca gregana* (34), suggesting a direct functional  
582 relationship via synaptic contact that may also be present in *T. dalmanni*.

583 Notably, the effects of 5-HT<sub>2</sub> receptor knockdown on aggression and NPFr  
584 were specific to males, with treated females showing no change either aggressive  
585 behavior, Tk or NPFr compared to vehicle-treated females. Similarly, 5-HTP  
586 treatment, which reliably increases male aggression (14, 15), had no effect on  
587 female aggression, despite causing an increase in brain 5-HT. Effects of social  
588 isolation both on aggression and on expression of 5-HT<sub>1A</sub> and 5-HT<sub>2</sub> receptors and  
589 Tk were also restricted to males. When taken in conjunction with the fact that males  
590 have naturally lower 5-HT<sub>2</sub> but elevated 5-HT<sub>1A</sub> receptor expression compared with  
591 females, along with reduced SERT, this implies that male aggression is much more  
592 tightly linked with elevated serotonergic signaling via specific subtypes. Specifically,  
593 we posit that reductions in 5-HT<sub>2</sub> activation in favor of 5-HT<sub>1A</sub> function may form the  
594 mechanistic basis of sex differences in regulation of aggression in this species.  
595 Further, the effects of altered 5-HT activity in promoting male aggression are in turn  
596 modulated by Tk and NPF, whereas these neuropeptides appear to play no role in  
597 female aggression. Identifying these mechanisms is an important step in elucidating  
598 factors driving the evolution of sex-specific behaviors in invertebrates.

599 Comparing the effects of socio-environmental factors against those of genetic  
600 and pharmacological manipulation provided a valuable opportunity to elucidate how  
601 discrete components of an aggressive interaction are specifically mediated by  
602 monoaminergic and peptidergic activity (Table 2). For example, the increase in both  
603 aggression and NPF receptor expression following 5-HTP treatment in male flies  
604 seems counterintuitive, since NPF is posited to be inhibitory towards aggression.  
605 However, parsing out contest initiation, escalation and outcome across experimental  
606 procedures reveals that while 5-HTP administration increases expression of high  
607 intensity behaviors, it does not affect initiations (14,15). In contrast, increases in  
608 initiations were seen after both social isolation and 5-HT<sub>2</sub> receptor knockdown, and  
609 were associated with either no change or a decrease in NPF receptor expression,  
610 respectively. Increases in NPF signaling may therefore only be important in  
611 decreasing the motivation to engage in the opening stages of the contest (Fig. 8),  
612 but have little to no effect in fight escalation, which differs from the direct  
613 suppression of high intensity aggression by this peptide seen in mice (22) and  
614 *Drosophila* (12). Similarly, both 5-HTP treatment and 5-HT<sub>2</sub> receptor knockdown  
615 enhance the probability of winning, yet each manipulation results in opposite  
616 changes to NPF receptor expression (Table 2), suggesting NPF has no role in  
617 determining contest outcome. Stage specific functions for 5-HT<sub>2</sub> receptors and Tk  
618 were also indicated when comparing across experimental manipulations (Table 2),  
619 with a primary role suggested for 5-HT<sub>2</sub> receptors in contest initiations, while Tk  
620 serves to modulate high intensity aggression (Fig. 8). However, winning appears to  
621 be associated with both reduced 5-HT<sub>2</sub> receptor expression and heightened Tk

622 (Table 2). Together, findings suggest the motivation to engage in a contest is  
 623 enhanced by decreased 5-HT<sub>2</sub> receptor activation, which may be potentiated by  
 624 reduced NPF signaling. As the contest progresses, reduced 5-HT<sub>2</sub> activity is  
 625 maintained but no longer influences behavior, with escalations in intensity driven  
 626 largely by increases in Tk. The combination of increased initiations and high  
 627 intensity aggression then serves to increase the probability of winning (Fig. 8).  
 628

629 Table 2. Effects of experimental manipulations on expression of 5-HT receptors, neuropeptides and  
 630 aggressive behavior in male stalk-eyed flies, *Teleopsis dalmanni*.

| Manipulation                   | 5-HT <sub>1A</sub> | 5-HT <sub>2</sub> | NPF | Tk           | Contest<br>Initiations | High<br>intensity<br>aggression | Wins |
|--------------------------------|--------------------|-------------------|-----|--------------|------------------------|---------------------------------|------|
| Social<br>isolation            | No<br>change       | ↓                 |     | ↑            | ↑                      | ↑                               | ↑    |
| 5-HT <sub>2</sub><br>knockdown | No<br>change       | ↓                 | ↓   | No<br>change | ↑                      | No<br>change                    | ↑    |
| 5-HTP<br>treatment             | No<br>change       | No<br>change      | ↑   | ↑            | No<br>change*          | ↑*                              | ↑*   |

631 \*From Bubak et al., 2014b

632

633

634 **Fig. 8.** Schematic diagram illustrating proposed relationships between 5-HT /  
 635 neuropeptide signaling and stages of aggressive conflict in male stalk-eyed flies. The  
 636 motivation to engage in aggression appears to be promoted by a reduction in 5-HT<sub>2</sub>  
 637 receptor activity, which may directly inhibit NPF signaling. Escalation in aggression as  
 638 the contest proceeds is driven by an increase in Tk, with 5-HT<sub>2</sub> receptors and NPF no  
 639 longer influencing behavior. Greater willingness to engage and subsequent expression  
 640 of high intensity aggression then facilitate the probability of winning.  
 641

642 It is generally presented that 5-HT has a largely inhibitory role in vertebrate  
 643 aggression, including humans (60-65) while facilitating invertebrate aggression (1, 6,  
 644 12-15, 66-68). Here, we used a novel invertebrate model to show a more nuanced  
 645 role for 5-HT and its receptor subtypes in modulating aggression according to the

646 stage of conflict. Similarly differentiated functions of 5-HT receptor subtypes on the  
647 type of aggressive behavior are seen in mice and *Drosophila*, suggesting  
648 evolutionary conservation in neurochemical modulation of social behavior. However,  
649 it should be noted that our results with stalk-eyed flies point to a primary effect of  
650 NPF on contest initiation and not escalation, whereas the reverse pattern is seen in  
651 *Drosophila* (12). Our findings also indicate the possibility for a direct functional  
652 relationship between 5-HT receptors and NPF signaling in regulating aggression,  
653 which does not appear to be present in *Drosophila* (12). Such differences between  
654 two Dipteran fly species within the same taxonomic section (Diptera: Schizophora)  
655 cautions against generalizing findings from one species across others, but at the  
656 same time offers a valuable means of examining mechanisms leading to  
657 evolutionary divergence in behavior. We also show that the impact of 5-HT's  
658 interactive role with neuropeptides on discrete stages of aggressive conflict can be  
659 inhibitory, stimulatory, or even absent depending on the particular neuropeptide and  
660 on the sex of the individual. Thus, stating opposing roles for 5-HT between  
661 vertebrates and invertebrates overlooks the intricate and conserved interactive role  
662 this monoaminergic system has with other neurochemical systems known to  
663 influence aggressive behavior, while also not accounting for effects of sex.  
664 Investigating whether these interactions exist and function similarly in a range of  
665 animal species undergoing diverse selection pressures will aid in uncovering the  
666 origins, and by extension mechanisms, of this complex behavior.  
667  
668

669           **References**

670

- 671           1. Bubak, A. N., Grace, J. L., Watt, M. J., Renner, K. J., & Swallow, J. G. (2014a).  
672           Neurochemistry as a bridge between morphology and behavior: perspectives  
673           on aggression in insects. *Current Zoology*, 60(6), 778-790.
- 674           2. Bubak, A. N., Gerken, A. R., Watt, M. J., Costabile, J. D., Renner, K. J., &  
675           Swallow, J. G. (2016a). Assessment strategies and fighting patterns in animal  
676           contests: a role for serotonin? *Current Zoology*, 62(3), pp.257-263.
- 677           3. Nelson, R. J., & Trainor, B. C. (2007). Neural mechanisms of aggression.  
678           *Nature Reviews Neuroscience*, 8(7), 536-546.
- 679           4. Olivier, B., Mos, J., Van Oorschot, R. and Hen, R. (1995). Serotonin receptors  
680           and animal models of aggressive behavior. *Pharmacopsychiatry*, 28(S 2),  
681           pp.80-90.
- 682           5. Antonsen, B. L., & Paul, D. H. (1997). Serotonin and octopamine elicit  
683           stereotypical agonistic behaviors in the squat lobster *Munida quadrispina*  
684           (Anomura, Galatheidae). *Journal of Comparative Physiology a-Sensory*  
685           *Neural and Behavioral Physiology* 181: 501-510.
- 686           6. Huber, R., Orzeszyna, M., Pokorny, N., & Kravitz, E. A. (1997). Biogenic  
687           amines and aggression: experimental approaches in crustaceans. *Brain,*  
688           *behavior and evolution*, 50(Suppl. 1), 60-68.
- 689           7. Panksepp, J. B., Yue, Z., Drerup, C., & Huber, R. (2003). Amine  
690           neurochemistry and aggression in crayfish. *Microsc Res Tech.* 60(3):360-8.

- 691 8. Momohara, Y., Kanai, A. and Nagayama, T. (2013). Aminergic control of  
692 social status in crayfish agonistic encounters. *PloS one*, 8(9), p.e74489.
- 693 9. Dyakonova, V. E., & Krushinsky, A. L. (2013). Serotonin precursor (5-  
694 hydroxytryptophan) causes substantial changes in the fighting behavior of  
695 male crickets, *Gryllus bimaculatus*. *J Comp Physiol A Neuroethol Sens*  
696 *Neural Behav Physiol.* 199(7):601-9. doi: 10.1007/s00359-013-0804-z.
- 697 10. Bubak, A.N., Yaeger, J.D., Renner, K.J., Swallow, J.G., & Greene, M.J.  
698 (2016b). Neuromodulation of Nestmate Recognition Decisions by Pavement  
699 *Ants. PloS one*, 11(11), p.e0166417.
- 700 11. Szczuka, A., Korczyńska, J., Wnuk, A., Symonowicz, B., Szwacka, A.G.,  
701 Mazurkiewicz, P., Kostowski, W. and Godzińska, E.J. (2013). The effects of  
702 serotonin, dopamine, octopamine and tyramine on behavior of workers of the  
703 ant *Formica polyctena* during dyadic aggression tests. *Acta Neurobiol*  
704 *Exp*, 73, pp.495-520.
- 705 12. Dierick, H. A., & Greenspan, R. J. (2007). Serotonin and neuropeptide F have  
706 opposite modulatory effects on fly aggression. *Nature genetics*, 39(5), 678-  
707 682.
- 708 13. Alekseyenko, O. V., Lee, C., & Kravitz, E. A. (2010). Targeted manipulation of  
709 serotonergic neurotransmission affects the escalation of aggression in adult  
710 male *Drosophila melanogaster*. *PLoS One*, 5(5), e10806.
- 711 14. Bubak, A. N., Swallow, J. G., & Renner, K. J. (2013). Whole brain monoamine  
712 detection and manipulation in a stalk-eyed fly. *Journal of Neuroscience*  
713 *Methods* 219, 124-130.

- 714 15. Bubak, A. N., Renner, K. J., & Swallow, J. G. (2014b). Heightened serotonin  
715 influences contest outcome and enhances expression of high-intensity  
716 aggressive behaviors. *Behavioural brain research*, 259, 137-142.
- 717 16. Juárez, P., Valdovinos, M.G., May, M.E., Lloyd, B.P., Couppis, M.H. and  
718 Kennedy, C.H. (2013). Serotonin 2A/C receptors mediate the aggressive  
719 phenotype of TLX gene knockout mice. *Behavioural brain research*, 256,  
720 pp.354-361.
- 721 17. Takahashi, A., Quadros, I.M., de Almeida, R.M. and Miczek, K.A. (2011a).  
722 Brain serotonin receptors and transporters: initiation vs. termination of  
723 escalated aggression. *Psychopharmacology*, 213(2-3), pp.183-212.
- 724 18. Tierney, A.J. (2001). Structure and function of invertebrate 5-HT receptors: a  
725 review. *Comparative Biochemistry and Physiology Part A: Molecular &*  
726 *Integrative Physiology*, 128(4), pp.791-804.
- 727 19. Johnson, O., Becnel, J., & Nichols, C. D. (2009). Serotonin 5-HT(2) and 5-  
728 HT(1A)-like receptors differentially modulate aggressive behaviors in  
729 *Drosophila melanogaster*. *Neuroscience* 158:1292–1300.
- 730 20. Sánchez, C., Arnt, J., Hyttel, J. and Moltzen, E.K. (1993). The role of  
731 serotonergic mechanisms in inhibition of isolation-induced aggression in male  
732 mice. *Psychopharmacology*, 110(1), pp.53-59.
- 733 21. Takahashi, A., Quadros, I.M., de Almeida, R.M. and Miczek, K.A. (2011b).  
734 Behavioral and pharmacogenetics of aggressive behavior. In *Behavioral*  
735 *neurogenetics* (pp. 73-138). Springer Berlin Heidelberg.

- 736 22. Karl, T., Lin, S., Schwarzer, C., Sainsbury, A., Couzens, M., Wittmann, W.,  
737 Boey, D., von Hörsten, S. and Herzog, H. (2004). Y1 receptors regulate  
738 aggressive behavior by modulating serotonin pathways. *Proceedings of the*  
739 *National Academy of Sciences of the United States of America*, 101(34),  
740 pp.12742-12747.
- 741 23. Bubak, A. N., Rieger, N. S., Watt, M. J., Renner, K. J., & Swallow, J. G.  
742 (2015). David vs. Goliath: Serotonin modulates opponent perception between  
743 smaller and larger rivals. *Behavioural brain research*, 292, pp.521-527.
- 744 24. Halasz, J., Zelena, D., Toth, M., Tulogdi, A., Mikics, E., & Haller, J. (2009).  
745 Substance P neurotransmission and violent aggression: The role of tachykinin  
746 NK 1 receptors in the hypothalamic attack area. *European journal of*  
747 *pharmacology*, 611(1), 35-43.
- 748 25. Asahina, K., Watanabe, K., Duistermars, B. J., Hoopfer, E., González, C. R.,  
749 Eyjólfsson, E. A., Perona, P. and Anderson, D. J. (2014). Tachykinin-  
750 expressing neurons control male-specific aggressive arousal in  
751 *Drosophila*. *Cell*, 156(1), pp.221-235.
- 752 26. Dryden, S., Frankish, H. M., Wang, Q., Pickavance, L., & Williams, G.  
753 (1996a). The serotonergic agent fluoxetine reduces neuropeptide Y levels  
754 and neuropeptide Y secretion in the hypothalamus of lean and obese rats.  
755 *Neuroscience* 72(2):557-566.
- 756 27. Dryden, S., Frankish, H. M., Wang, Q., & Williams, G. (1996b). Increased  
757 feeding and neuropeptide Y (NPY) but not NPY mRNA levels in the



- 758 hypothalamus of the rat following central administration of the serotonin  
759 synthesis inhibitor p-chlorophenylalanine. *Brain Res* 724(2):232-237.
- 760 28. Smialowska, M., Bajkowska, M., Heilig, M., Obuchowicz, E., Turchan, J., Maj,  
761 M. and Przewlocki, R. (2001). Pharmacological studies on the monoaminergic  
762 influence on the synthesis and expression of neuropeptide Y and corticotropin  
763 releasing factor in rat brain amygdala. *Neuropeptides*, 35(2), pp.82-91.
- 764 29. Glass, J.D., DiNardo, L.A. & Ehlen, J.C. (2000). Dorsal raphe nuclear  
765 stimulation of SCN serotonin release and circadian phase-resetting. *Brain*  
766 *research*, 859(2), pp.224-232.
- 767 30. Maejima, T., Masseck, O. A., Mark, M. D., & Herlitze, S. (2013). Modulation of  
768 firing and synaptic transmission of serotonergic neurons by intrinsic G protein-  
769 coupled receptors and ion channels. *Frontiers in Integrative Neuroscience* 7:  
770 40.
- 771 31. Osborne, N. N., Cuello, A. C., & Dockray, G. J. (1982). Substance P and  
772 cholecystinin-like peptides in Helix neurons and cholecystinin and  
773 serotonin in a giant neuron. *Science* 216(4544):409-411.
- 774 32. Chamberlain, S. C., Pepper, J., Battelle, B. A., Wyse, G. A. and  
775 Lewandowski, T. J. (1986). Immunoreactivity in Limulus. II. Studies of  
776 serotoninlike immunoreactivity, endogenous serotonin, and serotonin  
777 synthesis in the brain and lateral eye. *Journal of Comparative*  
778 *Neurology*, 251(3), pp.363-375.
- 779 33. Langworthy, K., Helluy, S., Benton, J., & Beltz, B. (1997). Amines and  
780 peptides in the brain of the American lobster: immunocytochemical

- 781            localization patterns and implications for brain function. *Cell and tissue*  
782            *research*, 288(1), 191-206.
- 783        34. Ignell, R. (2001). Monoamines and neuropeptides in antennal lobe  
784            interneurons of the desert locust, *Schistocerca gregaria*: an  
785            immunocytochemical study. *Cell and Tissue Research*, 306(1), pp.143-156.
- 786        35. Boyer, C., Maubert, E., Charnay, Y., & Chichery, R. (2007). Distribution of  
787            neurokinin A-like and serotonin immunoreactivities within the vertical lobe  
788            complex in *Sepia officinalis*. *Brain research*, 1133, 53-66.
- 789        36. Boyan, G., Williams, L., & Herbert, Z. (2010). Multipotent neuroblasts  
790            generate a biochemical neuroarchitecture in the central complex of the  
791            grasshopper *Schistocerca gregaria*. *Cell and tissue research*, 340(1), pp.13-  
792            28.
- 793        37. Herbert, Z., Rauser, S., Williams, L., Kapan, N., Güntner, M., Walch, A. &  
794            Boyan, G. (2010). Developmental expression of neuromodulators in the  
795            central complex of the grasshopper *Schistocerca gregaria*. *Journal of*  
796            *morphology*, 271(12), pp.1509-1526.
- 797        38. Cruz-Bermúdez, N. D., & Marder, E. (2007). Multiple modulators act on the  
798            cardiac ganglion of the crab, *Cancer borealis*. *Journal of Experimental*  
799            *Biology*, 210(16), 2873-2884.
- 800        39. Rehm, K. J., Deeg, K. E., & Marder, E. (2008). Developmental Regulation of  
801            Neuromodulator Function in the Stomatogastric Ganglion of the Lobster,  
802            *Homarus americanus*. *The Journal of neuroscience* 28(39):9828-9839.

- 803 40. Manoli, D. S., Fan, P., Fraser, E. J. and Shah, N. M. (2013). Neural control of  
804 sexually dimorphic behaviors. *Current opinion in neurobiology*, 23(3), pp.330-  
805 338.
- 806 41. Al-khairulla, H., Warburton, D., & Knell, R.J. (2003). Do the eyestalks of  
807 female diopsid flies have a function in intrasexual aggressive  
808 encounters?. *Journal of Insect Behavior*, 16(5), pp.679-686.
- 809 42. Bath, E., Wigby, S., Vincent, C., Tobias, J.A., & Seddon, N. (2015). Condition,  
810 not eyespan, predicts contest outcome in female stalk-eyed flies, *Teleopsis*  
811 *dalmanni*. *Ecology and evolution*, 5(9), pp.1826-1836.
- 812 43. Burkhardt, D., de la Motte, I. (1983). How stalk-eyed flies eye stalk-eyed flies:  
813 observations and measurements of the eye of *Cyrtodiopsis whitei* (Diopsidae,  
814 Diptera). *J Comp Physiol* **151**, 407-421.
- 815 44. Wilkinson, G. S. (1993). Artificial sexual selection alters allometry in the stalk-  
816 eyed fly *Cyrtodiopsis dalmanni* (Diptera: Diopsidae). *Genet. Res., Camb.* **62**,  
817 213-222.
- 818 45. Egge, A.R., Brandt, Y., & Swallow, J.G. (2011). Sequential analysis of  
819 aggressive interactions in the stalk-eyed fly *Teleopsis dalmanni*. *Behavioral*  
820 *Ecology and Sociobiology*, 65(2), pp.369-379.
- 821 46. Schmittgen, Thomas, D., & Livak, K. J. (2008). Analyzing real-time PCR data  
822 by the comparative CT method. *Nature protocols* 3.6: 1101-1108.
- 823 47. Bradford, M. M. (1976). A rapid and sensitive method for the quantitation of  
824 microgram quantities of protein utilizing the principle of protein-dye binding.  
825 *Analytical Biochemistry* **72**, 248-54.

- 826 48. Twenge, J. M., Baumeister, R. F., Tice, D. M., & Stucke, T. S. (2001). If you  
827 can't join them, beat them: effects of social exclusion on aggressive behavior.  
828 *Journal of personality and social psychology*, 81(6), 1058.
- 829 49. Wongwitdecha, N., & Marsden, C. A. (1996). Social isolation increases  
830 aggressive behaviour and alters the effects of diazepam in the rat social  
831 interaction test. *Behavioural brain research*, 75(1), 27-32.
- 832 50. Alexander, R. D. (1961). Aggressiveness, territoriality, and sexual behavior in  
833 field crickets (Orthoptera: Gryllidae). *Behaviour* 17:130–223.
- 834 51. Blenau, W., & Baumann, A. (2001). Molecular and pharmacological properties  
835 of insect biogenic amine receptors: lessons from *Drosophila melanogaster*  
836 and *Apis mellifera*. *Archives of insect biochemistry and physiology*, 48(1),  
837 pp.13-38.
- 838 52. Martin, C.A., & Krantz, D.E. (2014). *Drosophila melanogaster* as a genetic  
839 model system to study neurotransmitter transporters. *Neurochemistry*  
840 *international*, 73, pp.71-88.
- 841 53. Vleugels, R., Lenaerts, C., Baumann, A., Vanden Broeck, J., Verlinden, H.  
842 (2013). Pharmacological Characterization of a 5-HT<sub>1</sub>-Type Serotonin  
843 Receptor in the Red Flour Beetle, *Tribolium castaneum*. *PLoS ONE*  
844 8(5):e65052.doi:10.1371/journal.pone.0065052.
- 845 54. Baker, K.G., Halliday, G.M., Hornung, J.P., Geffen, L.B., & Cotton, R.G.H.  
846 (1991). Distribution, morphology and number of monoamine-synthesizing and  
847 substance P-containing neurons in the human dorsal raphe  
848 nucleus. *Neuroscience*, 42(3), pp.757-775.

- 849 55. Stevenson, P.A., & Rillich, J. (2013). Isolation associated aggression—a  
850 consequence of recovery from defeat in a territorial animal. *PLoS One*, 8(9),  
851 p.e74965.
- 852 56. Ueda, A., & Wu, C.F. (2009). Effects of social isolation on neuromuscular  
853 excitability and aggressive behaviors in *Drosophila*: altered responses by Hk  
854 and gsts1, two mutations implicated in redox regulation. *Journal of*  
855 *neurogenetics*, 23(4), pp.378-394.
- 856 57. Katsouni, E., Sakkas, P., Zarros, A., Skandali, N., & Liapi, C. (2009). The  
857 involvement of substance P in the induction of aggressive  
858 behavior. *Peptides*, 30(8), pp.1586-1591.
- 859 58. Grignaschi, G., Sironi, F., & Samanin, R. (1996). Stimulation of 5-HT<sub>2A</sub>  
860 receptors in the paraventricular hypothalamus attenuates neuropeptide Y-  
861 induced hyperphagia through activation of corticotropin releasing factor. *Brain*  
862 *Res*, 708(1-2), 173-176.
- 863 59. Aoki, M., Watanabe, Y., Yoshimoto, K., Tsujimura, A., Yamamoto, T.,  
864 Kanamura, N., & Tanaka, M. (2016). Involvement of serotonin 2C receptor  
865 RNA editing in accumbal neuropeptide Y expression and behavioural despair.  
866 *Eur J Neurosci*, 43(9), 1219-1228. doi:10.1111/ejn.13233.
- 867 60. Brown, G.L., Goodwin, F.K., Ballenger, J.C., Goyer, P.F., & Major, L.F.,  
868 (1979). Aggression in humans correlates with cerebrospinal fluid amine  
869 metabolites. *Psychiatry Res.* 1, 131–139.
- 870 61. Linnoila, M., Virkkunen, M., Scheinin, M., Nuutila, A., Rimon, R., Goodwin, F.  
871 K. (1983). Low cerebrospinal fluid 5-hydroxyindoleacetic acid concentration

- 872           differentiates impulsive from nonimpulsive violent behavior. *Life Sci.* 33,  
873           2609–2614.
- 874   62. Mann, J. J. (1995). Violence and aggression. In Bloom FE, Kupfer DJ (eds),  
875           *Psychopharmacology: The Fourth Generation of Progress*. New York, Raven  
876           Press, pp 1919–1928.
- 877   63. Mann, J. J. (1999). Role of the serotonergic system in the pathogenesis of  
878           major depression and suicidal behavior. *Neuropsychopharmacology* 21, 99–  
879           105.
- 880   64. Ferrari, P. F., Palanza, P., Parmigiani, S., de Almeida, R. M., & Miczek, K. A.  
881           (2005). Serotonin and aggressive behavior in rodents and nonhuman  
882           primates: predispositions and plasticity. *European Journal of Pharmacology*,  
883           526(1), 259-273.
- 884   65. Summers, C. H., & Winberg, S. (2006) Interactions between the neural  
885           regulation of stress and aggression. *Journal of Experimental Biology* 209.23:  
886           4581-4589.
- 887   66. Livingstone, M. S., Harris-Warrick, R. M., & Kravitz, E. A. (1980). Serotonin  
888           and octopamine produce opposite postures in lobsters. *Science*, 208(4439),  
889           76-79.
- 890   67. Edwards, D. H., & Kravitz, E. A. (1997). Serotonin, social status and  
891           aggression. *Current opinion in neurobiology*, 7(6), 812-819.
- 892   68. Alekseyenko, O. V., Chan, Y. B., de la Paz Fernandez, M., Bülow, T.,  
893           Pankratz, M. J., & Kravitz, E. A. (2014). Single serotonergic neurons that  
894           modulate aggression in *Drosophila*. *Current Biology*, 24(22), 2700-2707.

895

896 **Acknowledgments:** This work was funded by NSF Grants IOS 1256898 (to J.G.S)

897 and IOS 1257679 (to M.J.W.). We thank Dr. Michael Greene for his helpful

898 comments that improved the manuscript.

899

900 **Author Contributions:** A.N. Bubak wrote the paper and designed and conducted

901 the behavioral experiments. J.G. Swallow contributed to the design of the behavioral

902 experiments and contributed to writing the manuscript. J.D.W. Yaeger and K.J.

903 Renner conducted the monoamine analysis and contributed to writing the

904 manuscript.

905

906 Figure 1

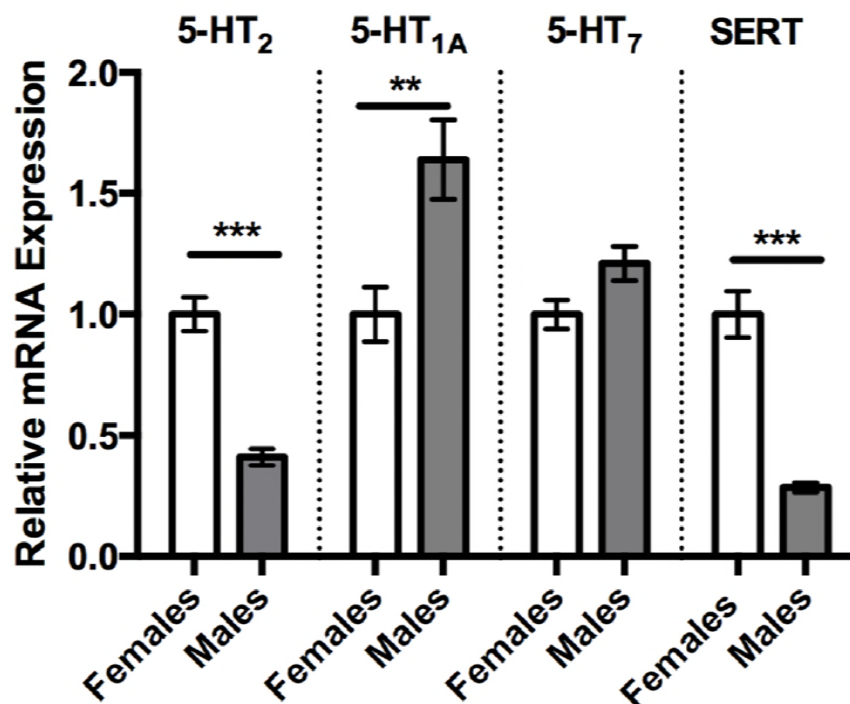

907 Figure 2

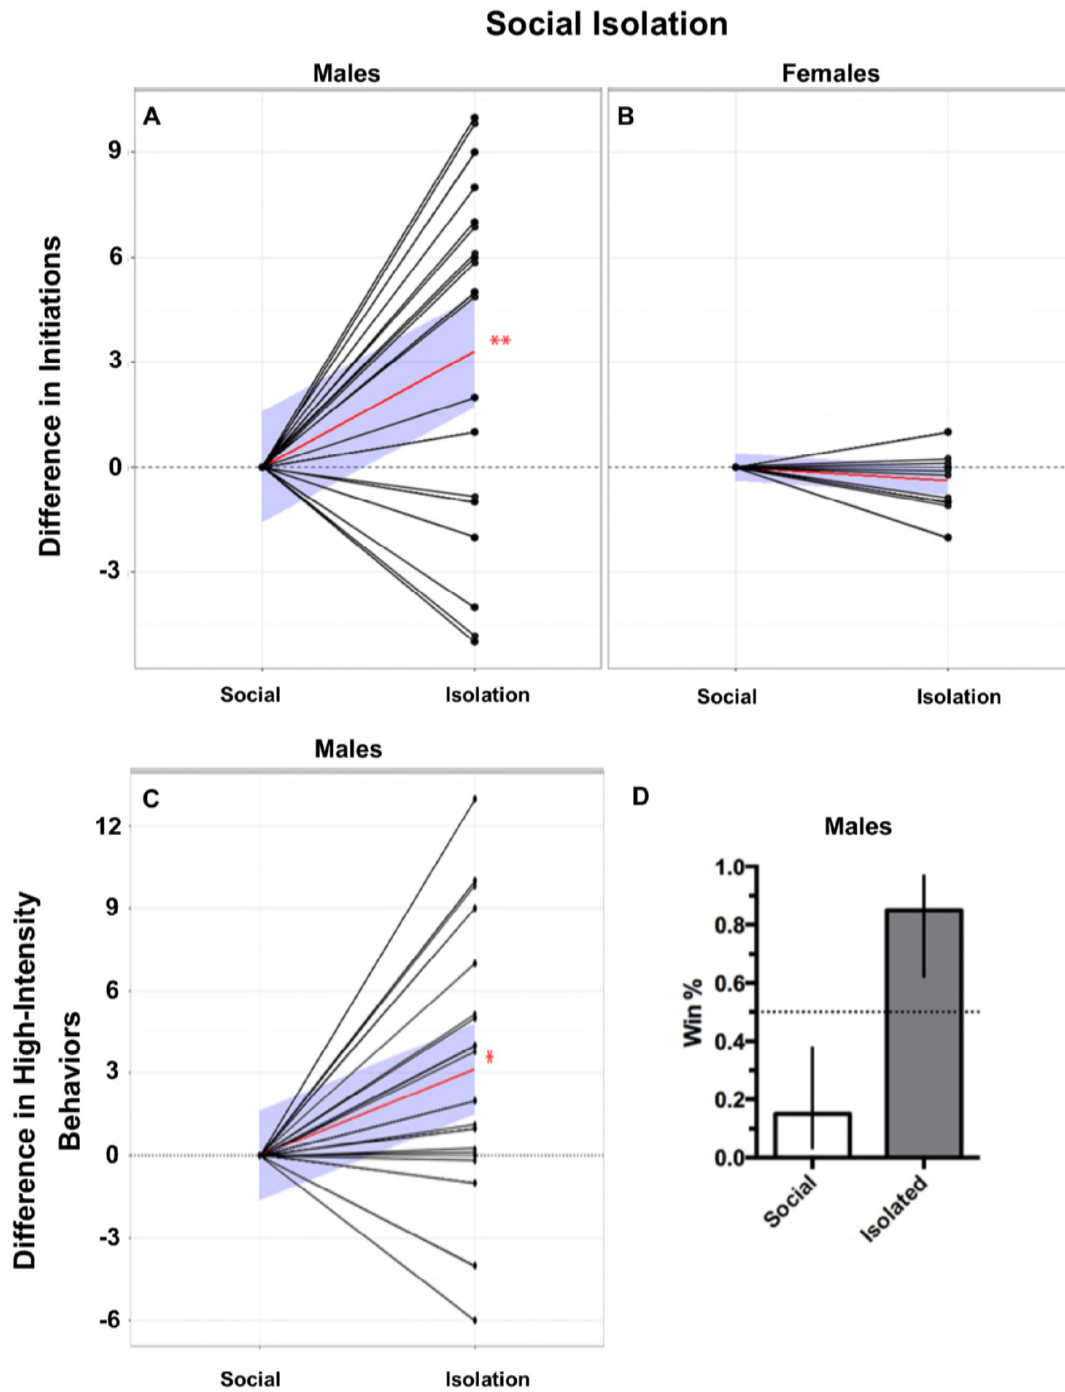

908  
909



910 Figure 3

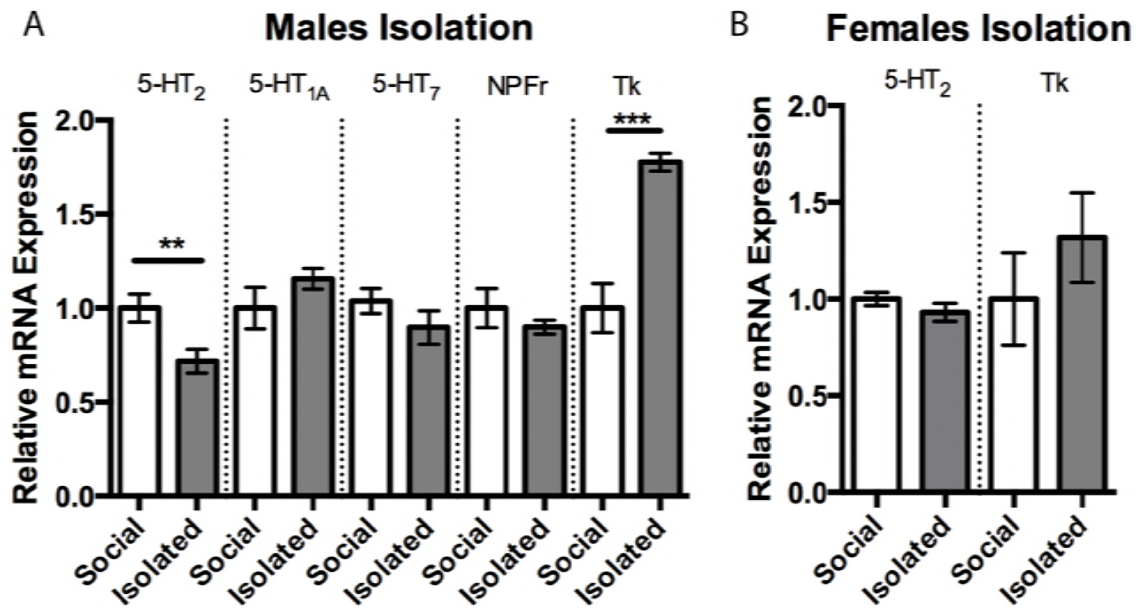

911  
912

913 Figure 4

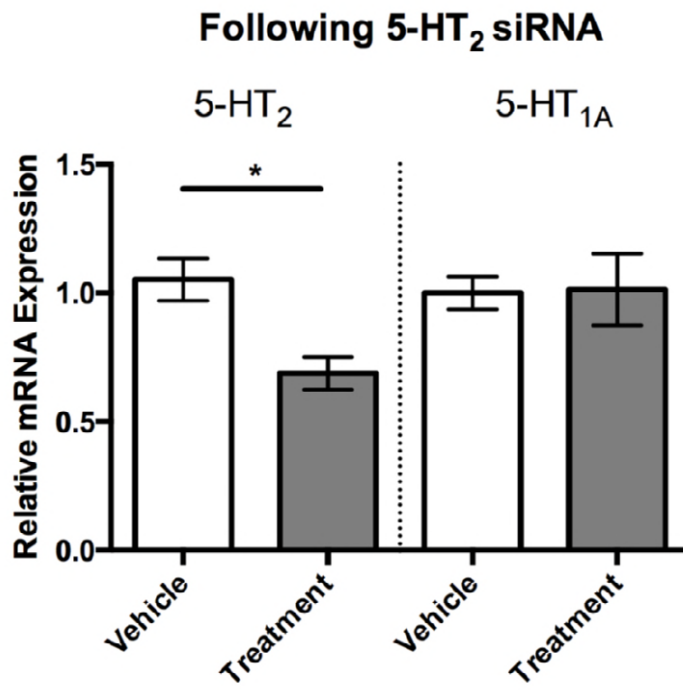

914

915 Figure 5

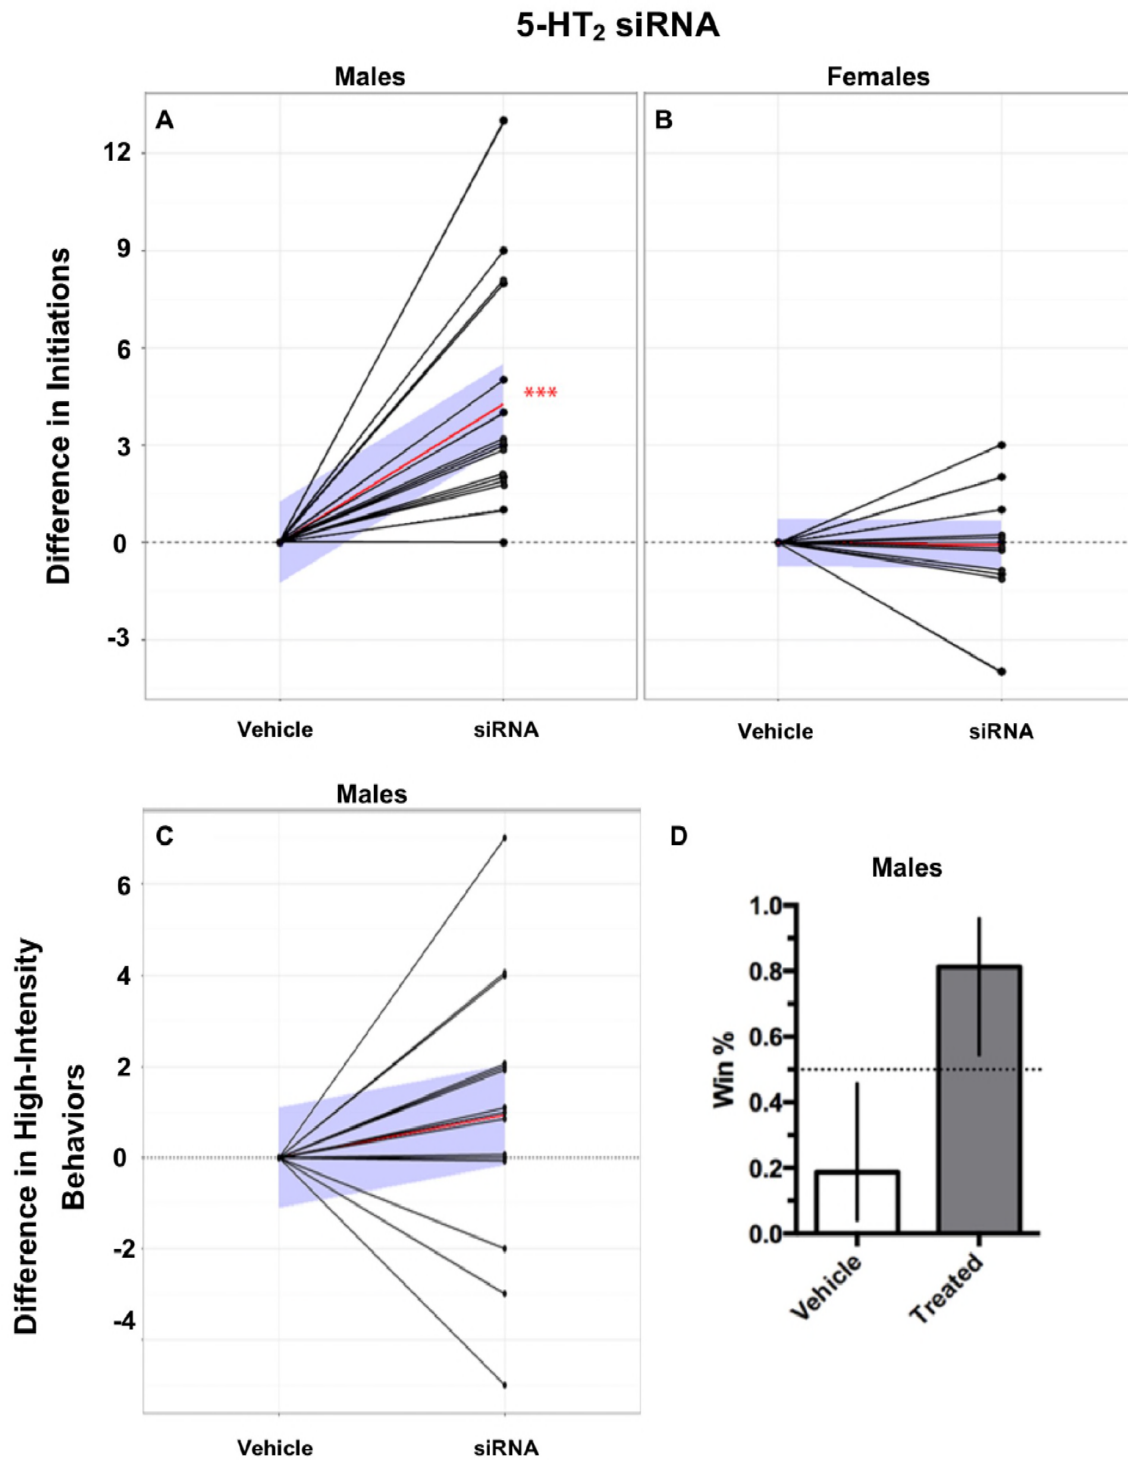

916  
917

918 Figure 6  
919

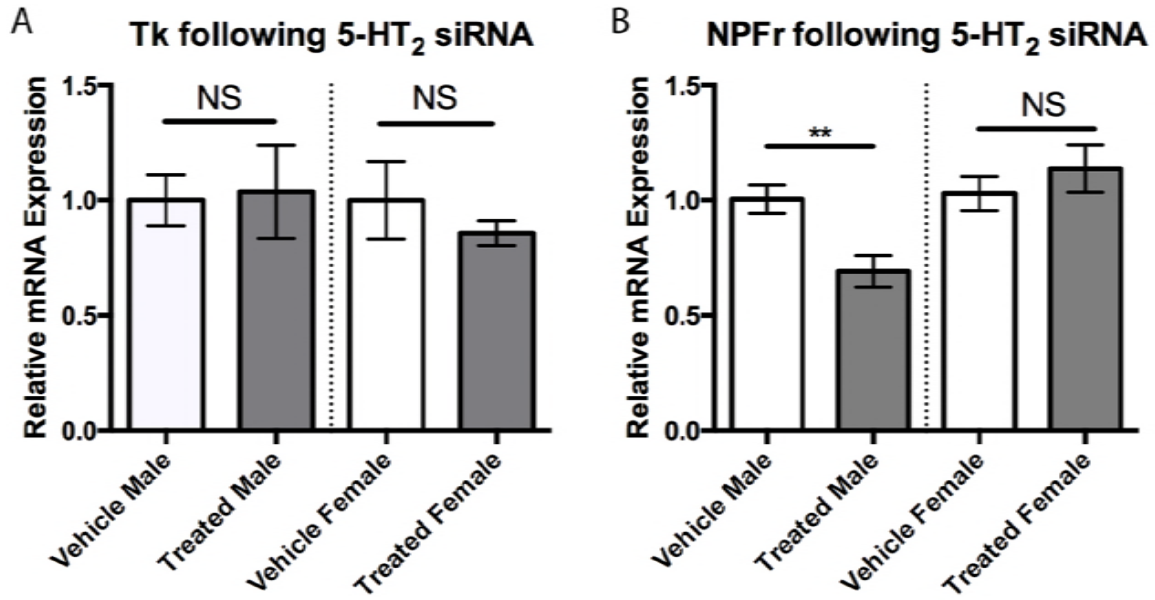

920

921 Figure 7

**A Tachykinin (5-HTP dosing)**

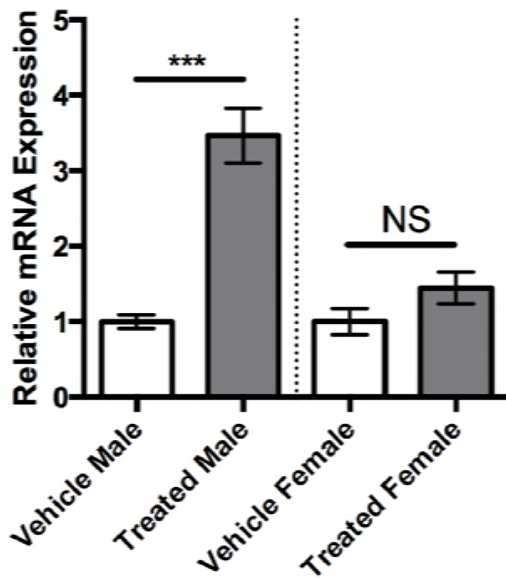

**B NPFr (5-HTP dosing)**

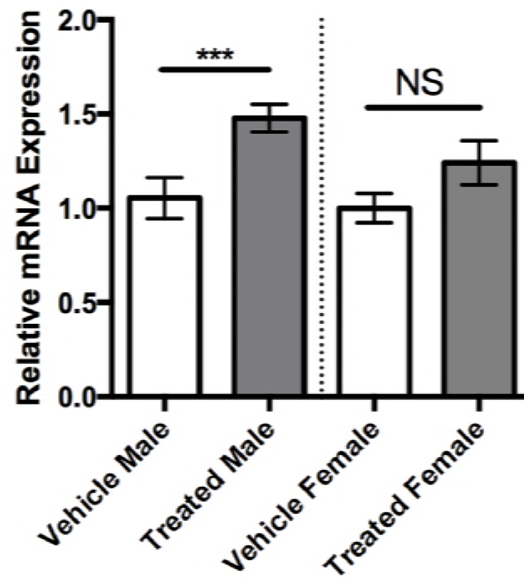

922  
923  
924

925 Figure 8

926

927

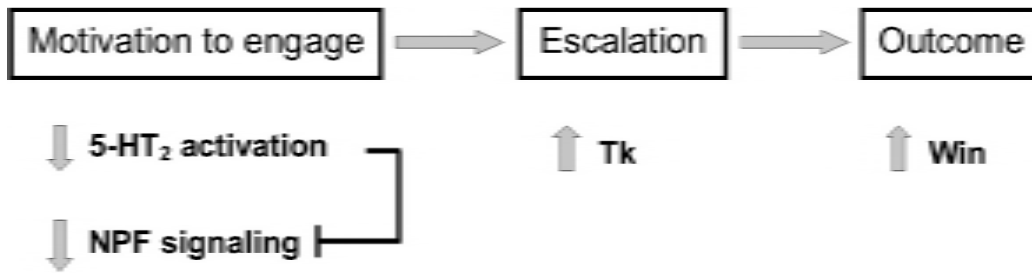

928

929

930

931

932

933

934

935

936

937

938

939

940

941

942

943

944

945

946

947

948 **Significance Statement**

949 Serotonin's (5-HT) modulatory role in aggression is generally reported as inhibitory  
950 in vertebrates but stimulatory in invertebrates. Using a novel invertebrate model  
951 system, we provide evidence of common pathways of aggression at the 5-HT  
952 receptor subtype level as well as 5-HT's interactive role with other neurochemical  
953 systems namely neuropeptide F and tachykinin. Additionally, we found that these  
954 effects were sex-dependent as well as stage-dependent affecting either the initiation  
955 or escalation stage of an aggressive contest. Our results reveal the impressive level  
956 of conservation with respect to neurochemical mechanisms among species as  
957 diverse as vertebrates and invertebrates, and highlights the need to consider  
958 multiple factors when determining potential taxonomic differences in how 5-HT  
959 mediates aggression.

960
